# Supplementary material for: Temperature and solvent-dependent photoluminescence quenching in [Ru(bpy)2(bpy-cc-AQ)]2+
Source: Royal Society of Chemistry journal article supplement (doi:10.1039/d0cp05044j), 2021-01-01
Supplement: d0cp05044j1.pdf [file d0cp05044j1.pdf]

# Temperature and Solvent-Dependent Photoluminescence Quenching in [Ru(bpy)<sub>2</sub>(bpy-cc-AQ)]<sup>2+</sup>

## Supporting Information

Christopher B. Larsen\*

*Stanford PULSE Institute, SLAC National Accelerator Laboratory, Stanford University, 2575 Sand Hill Road, Menlo Park, CA 94025, USA*

### Variable Temperature Photoluminescence Lifetime Fitting

Fitting of the variable temperature photoluminescence lifetimes to Equation 4 in the main paper using a least squares algorithm without constraints yields the parameters presented in Table S1, with:

$$\chi^2 = \sum_i \frac{(x_i - m_i)^2}{m_i} \quad (S1)$$

Where  $x_i$  is the observed value, and  $m_i$  the predicted value. It is immediately clear that the values of  $\tau_{MLCT}$  for the high polarity solvents derived using this approach are not physically meaningful, despite qualitatively good fits to the data.  $\tau_{MLCT}$  was therefore constrained to the value obtained for 1,2-dichloroethane (4.27  $\mu$ s), which yielded the parameters reported in Table S2. Although  $\tau_{MLCT}$  would be expected to exhibit some solvent dependence, the difference in magnitude between solvents should be relatively small, validating the constraint. For example, [Ru(bpy)<sub>3</sub>]<sup>2+</sup> has  $\tau_{MLCT}$  range from 2.4-1.8  $\mu$ s between dichloromethane and acetonitrile (ref. 47).

By comparing Tables S1-2, it can be observed that constraining  $\tau_{MLCT}$  has only little effect on the other fit parameters, with butyronitrile exhibiting the greatest deviation. For acetonitrile, the deviation is almost negligible. It can therefore be surmised that the inability of the fit to accurately model  $\tau_{MLCT}$  arises from the difference in magnitude between  $\tau_{MLCT}$  and  $\tau_{obs}$ . This limitation of the model is exemplified in Figure S1, in which it can be observed that the experimental values of  $\tau_{obs}$  only represent a small fraction of the modelled  $\tau$  range, and furthermore are restricted to areas close to the upper limit in 1,2-dichloroethane and the lower limit in the high polarity solvents. To accurately derive all parameters, a greater fraction of the modelled  $\tau_{obs}$  range would need to be sampled. However, from the extrapolated fits in Figure S1, it is evident that the ability to sample a wide-enough temperature range to satisfactorily derive all parameters is severely restricted by solvent boiling points.

Table S1. Parameters derived from unconstrained least squares fitting of variable-temperature lifetimes of [Ru(bpy)<sub>2</sub>(bpy-cc-AQ)]<sup>2+</sup> to Equation 4 in the main paper.

| Solvent       | $\tau_{MLCT} / \mu$ s | $\tau_{CR} /$ ns | $\Delta H_{ET} /$ eV | $\Delta S_{ET} /$ meV K <sup>-1</sup> | $\chi^2$             |
|---------------|-----------------------|------------------|----------------------|---------------------------------------|----------------------|
| Butyronitrile | 1.53                  | 135              | -0.44                | -1.55                                 | 0.20                 |
| Acetonitrile  | $5.1 \times 10^4$     | 1.29             | -0.33                | -1.24                                 | $4.7 \times 10^{-4}$ |
| Ethanol       | 0.050                 | 7.35             | -0.56                | -1.77                                 | $2.6 \times 10^{-4}$ |

Table S2. Parameters derived from least squares fitting of variable-temperature lifetimes of [Ru(bpy)<sub>2</sub>(bpy-cc-AQ)]<sup>2+</sup> to Equation 4 in the main paper, with  $\tau_{MLCT}$  constrained to 4.27  $\mu$ s.

| Solvent       | $\tau_{MLCT} / \mu$ s | $\tau_{CR} /$ ns | $\Delta H_{ET} /$ eV | $\Delta S_{ET} /$ meV K <sup>-1</sup> | $\chi^2$             |
|---------------|-----------------------|------------------|----------------------|---------------------------------------|----------------------|
| Butyronitrile | 4.27 <sup>a</sup>     | 89.2             | -0.31                | -1.15                                 | 0.42                 |
| Acetonitrile  | 4.27 <sup>a</sup>     | 1.31             | -0.33                | -1.24                                 | $4.8 \times 10^{-4}$ |
| Ethanol       | 4.27 <sup>a</sup>     | 7.16             | -0.48                | -1.49                                 | $5.4 \times 10^{-4}$ |

<sup>a</sup> Value constrained

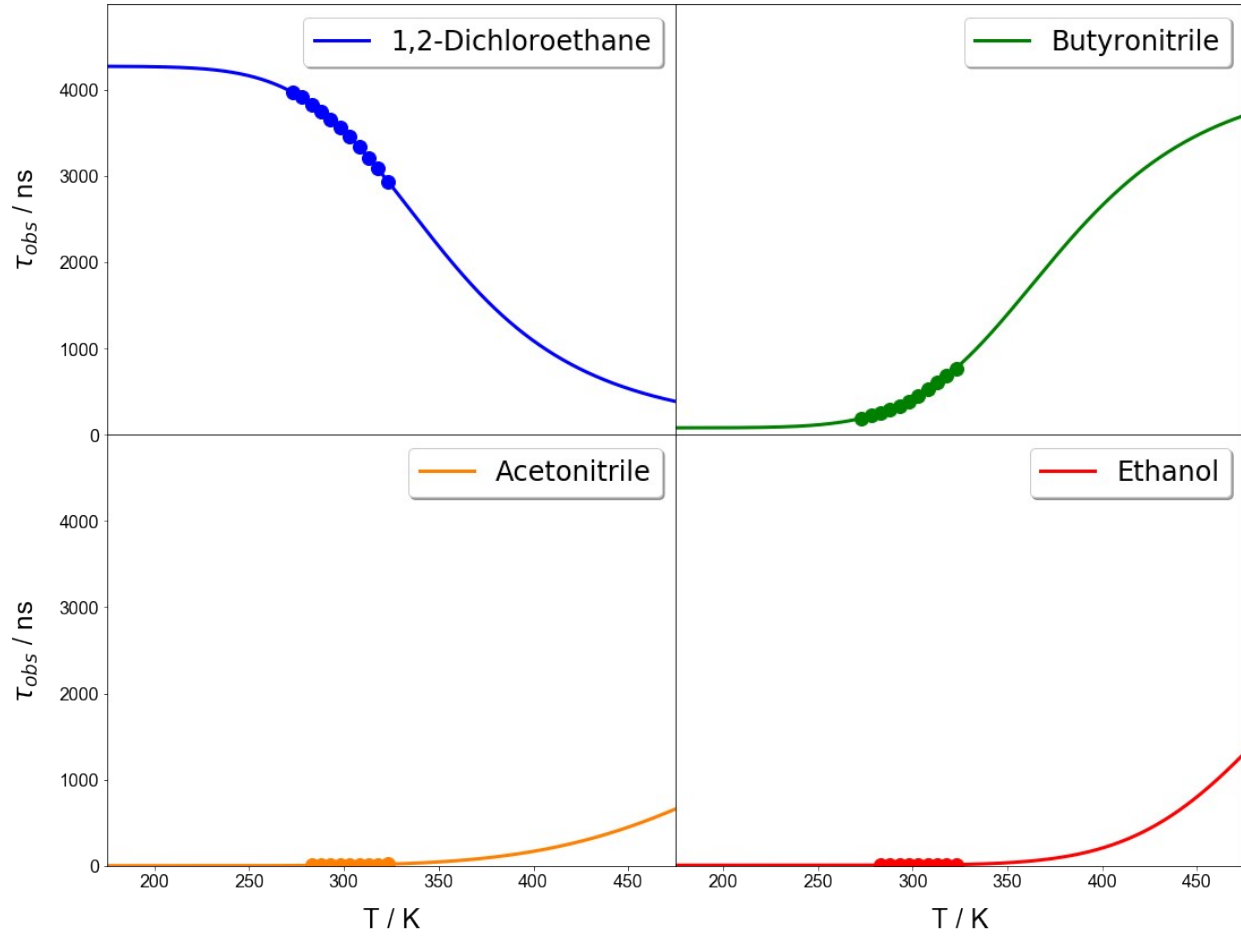

Figure S1. Extrapolated fits of the variable temperature photoluminescence lifetimes in 1,2-dichloroethane, butyronitrile, acetonitrile and ethanol to Equation 4 in the main paper, with  $\tau_{MLCT}$  constrained to 4.27  $\mu$ s (corresponding to the parameters derived in Table S2).

### Marcus Theory Considerations

Merging Equations 3 and 6 from the main paper yields Equation S2a.

$$k_{obs} = \frac{k_{MLCT} + \sqrt{\frac{\pi}{h^2 \lambda k_B T}} \cdot H_{DA}^2 \cdot e^{-\left(\frac{\Delta G_{CR}^\ddagger}{k_B T}\right)} \cdot e^{-\left(\frac{\Delta G_{ET}}{k_B T}\right)}}{1 + e^{-\left(\frac{\Delta G_{ET}}{k_B T}\right)}} \quad (S2a)$$

Where the activation energy for charge recombination is defined by Equation S2b.

$$\Delta G_{CR}^\ddagger = \frac{(\lambda + \Delta G_{CR})^2}{4\lambda k_B T} \quad (S2b)$$

Treating the pre-exponential terms as a constant, Equation S2a can be rearranged to Equation S3.

$$k_{obs} = \frac{k_{MLCT} + \frac{A}{\sqrt{T}} \cdot e^{-\left(\frac{\Delta G_{ET} + \Delta G_{CR}^{\ddagger}}{k_B T}\right)}}{1 + e^{-\left(\frac{\Delta G_{ET}}{k_B T}\right)}} \quad (S3)$$

Assuming no temperature-dependence of  $\Delta G_{ET}$ , Equation S3 is unable to even qualitatively reproduce the variable temperature behaviour of the photoluminescence lifetimes in the higher polarity solvents. It is therefore evident that any temperature-dependence of  $k_{CR}$  alone cannot account for the observed variable temperature photoluminescence lifetime behaviour.

From Figure 3 in the main paper, it can be observed that:

$$\Delta G_{CR} = - (G_{MLCT} + \Delta G_{ET}) \quad (S4)$$

Where  $G_{MLCT}$  is the energy of the MLCT excited state, previously determined as 1.97 eV (ref. 43). Using the parameters derived for butyronitrile from Table 1 in the main paper, and a hypothetical  $\lambda$  of 1.5 eV, the values reported in Table S3 are obtained. Of particular note is the difference in thermal sensitivity between  $\Delta G_{ET}$  and  $\Delta G_{CR}^{\ddagger}$ , which elicit a 670% and 20% increase in  $K_{eq}$  and  $k_{CR}$  (defined by the exponential term in Equations S2a and S3 – as the pre-exponential term is treated as a constant), respectively, across the investigated temperature range. It is therefore evident, based on Equations 4, S2a and S3, that the observed rate constant for photoluminescence ( $\tau_{obs}$ ) is dominated by the thermal sensitivity of  $K_{eq}$  as opposed to that of  $k_{CR}$ .

Table S3. Temperature-dependent parameters obtained from Equations 4 and 5 (from the main paper), S2, S3 and S4 for butyronitrile, with  $\Delta H_{ET} = -0.31$  eV,  $\Delta S_{ET} = -1.15$  meV K<sup>-1</sup>,  $G_{MLCT} = 1.97$  eV, and  $\lambda = 1.5$  eV.

| T / K | $\Delta G_{ET}$ / meV | $\Delta G_{CR}$ / eV | $\Delta G_{CR}^{\ddagger}$ / meV | $K_{eq}$ | $\frac{e^{-\left(\frac{\Delta G_{CR}^{\ddagger}}{k_B T}\right)}}{\sqrt{T}} (\times 10^{-3})$ |
|-------|-----------------------|----------------------|----------------------------------|----------|----------------------------------------------------------------------------------------------|
| 273   | 3.95                  | -1.97                | 37.4                             | 0.85     | 12.3                                                                                         |
| 278   | 9.70                  | -1.98                | 38.4                             | 0.67     | 12.1                                                                                         |
| 283   | 15.5                  | -1.99                | 39.3                             | 0.53     | 11.9                                                                                         |
| 288   | 21.2                  | -1.99                | 40.2                             | 0.43     | 11.7                                                                                         |
| 293   | 27.0                  | -2.00                | 41.2                             | 0.34     | 11.4                                                                                         |
| 298   | 32.7                  | -2.00                | 42.1                             | 0.28     | 11.2                                                                                         |
| 303   | 38.5                  | -2.01                | 43.1                             | 0.23     | 11.0                                                                                         |
| 308   | 44.2                  | -2.01                | 44.1                             | 0.19     | 10.8                                                                                         |
| 313   | 50.0                  | -2.02                | 45.1                             | 0.16     | 10.6                                                                                         |
| 318   | 55.7                  | -2.03                | 46.1                             | 0.13     | 10.4                                                                                         |
| 323   | 61.5                  | -2.03                | 47.1                             | 0.11     | 10.3                                                                                         |

#### Dielectric Continuum Model Solvent Effects

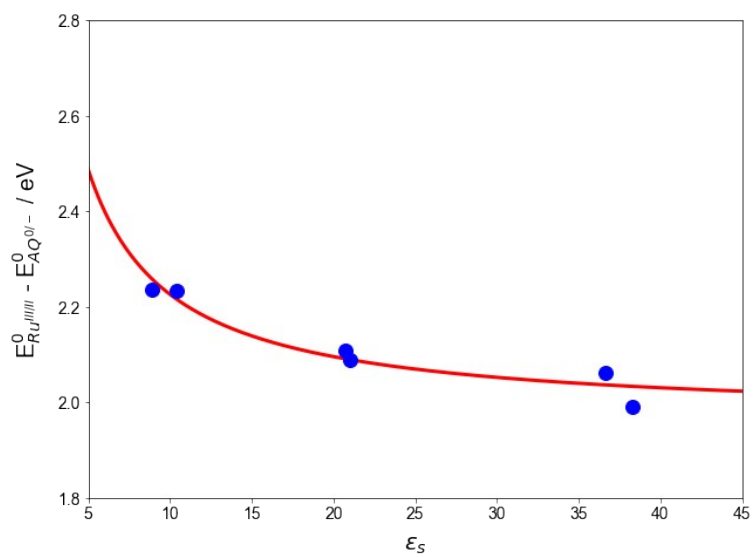

Figure S2. Fit of electrochemical data of  $[\text{Ru}(\text{bpy})_2(\text{bpy-cc-AQ})]^{2+}$  from ref. 43 to Equation 7 in the main paper, with  $a_1 = a_2 = 4 \text{ \AA}$ , and  $r_{\text{DA}} = 12.8 \text{ \AA}$ , yielding  $\Delta G_{\text{vac}}$  of 4.57 eV.
